# Supplementary material
Source: PubMed Central journal article supplement (PMC2268786)

(a)

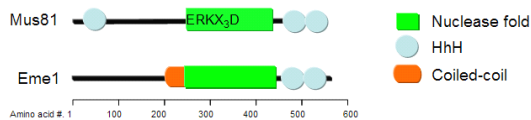

(b)

### Eme1 contains a conserved nuclease fold

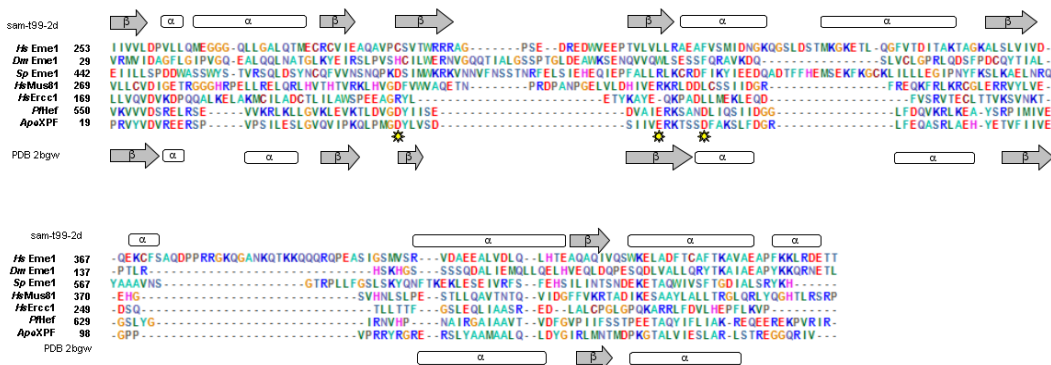

(c)

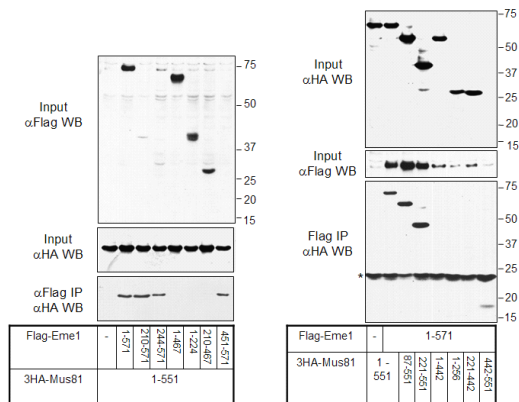

(d)

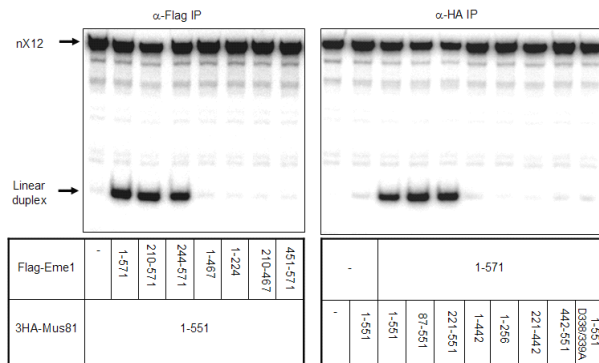

Supplement: pnas_0710291105_1.pdf [file pnas_0710291105_1.pdf]

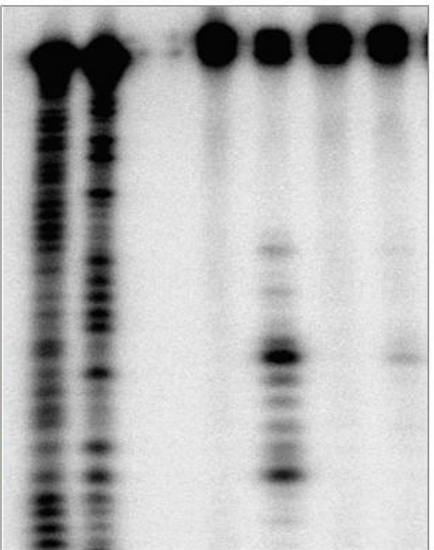

**EcME<sub>D338/339A</sub>**

**EcME<sub>D307A</sub>**

**EcME**

**No enzyme**

**AG**

**TC**

**CGTTCGGT**

Supplement: pnas_0710291105_3.pdf [file pnas_0710291105_3.pdf]

## Native

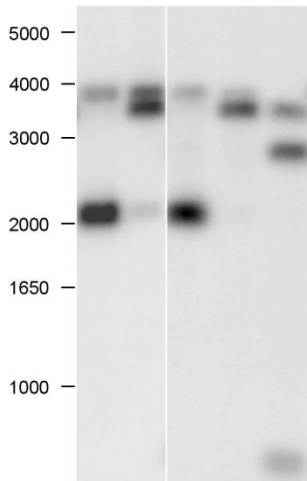

|               |   |   |   |   |   |
|---------------|---|---|---|---|---|
| 10nM EcME     | - | + | - | + | + |
| T4 DNA ligase | - | - | + | + | + |
| BamHI         | - | - | - | - | + |

## Denaturing

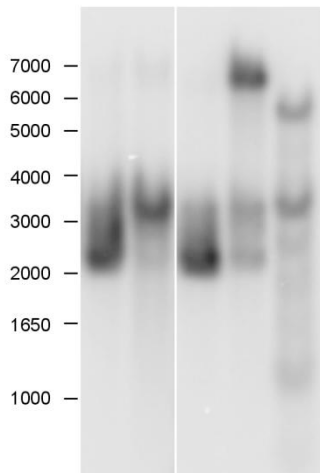

|               |   |   |   |   |   |
|---------------|---|---|---|---|---|
| 10nM EcME     | - | + | - | + | + |
| T4 DNA ligase | - | - | + | + | + |
| BamHI         | - | - | - | - | + |

Supplement: pnas_0710291105_6.pdf [file pnas_0710291105_6.pdf]
